# Supplementary material
Source: PubMed Central journal article supplement (PMC8284191)
Supplement: NIHMS1705609-supplement-Supplemental_Material.pdf [file NIHMS1705609-supplement-Supplemental_Material.pdf]

**Supplementary information**

---

**Sex disparities matter in cancer  
development and therapy**

---

In the format provided by the  
authors and unedited

Supplementary Table 1. **Kyoto Encyclopedia of Genes and Genomes Pathways and Immune signatures enriched among the X and Y chromosome genes as determined by over-representation analysis.**

| Pathway or signature                     | adjusted_p_value | term_size | query_size | inter-section_size | intersections                                                                                                                                                                                                                                                                                                           |
|------------------------------------------|------------------|-----------|------------|--------------------|-------------------------------------------------------------------------------------------------------------------------------------------------------------------------------------------------------------------------------------------------------------------------------------------------------------------------|
| X chromosome                             |                  |           |            |                    |                                                                                                                                                                                                                                                                                                                         |
| Metabolic pathways                       | 1.20E-06         | 1482      | 732        | 46                 | DGKK, OCRL, MTM1, PRPS2, NDUFB11, PIGA, EBP, ALG13, PFKFB1, TKTL1, ATP6AP1, PCYT1B, RENBP, MTMR8, ACSL4, OTC, SAT1, NSDHL, GUCY2F, G6PD, NDUFA1, PGK1, IDH3G, CA5B, GYG2, GLUD2, MAOB, ASMT, PDHA1, RGN, HSD17B10, CTPS2, PGAM4, C1GALT1C1, HPRT1, ALAS2, PRPS1, MAOA, UPRT, MTMR1, SMS, TMLHE, GK, GLA, COX7B, SUV39H1 |
| Carbon metabolism                        | 7.57E-05         | 117       | 732        | 10                 | PRPS2, TKTL1, G6PD, PGK1, IDH3G, GLUD2, PDHA1, RGN, PGAM4, PRPS1                                                                                                                                                                                                                                                        |
| Pentose phosphate pathway                | 0.000999425      | 30        | 732        | 5                  | PRPS2, TKTL1, G6PD, RGN, PRPS1                                                                                                                                                                                                                                                                                          |
| Biosynthesis of amino acids              | 0.001032299      | 75        | 732        | 7                  | PRPS2, TKTL1, OTC, PGK1, IDH3G, PGAM4, PRPS1                                                                                                                                                                                                                                                                            |
| Glycine, serine and threonine metabolism | 0.017030845      | 40        | 732        | 4                  | MAOB, PGAM4, ALAS2, MAOA                                                                                                                                                                                                                                                                                                |
| Arginine and proline metabolism          | 0.03044943       | 49        | 732        | 4                  | SAT1, MAOB, MAOA ,SMS                                                                                                                                                                                                                                                                                                   |
| mRNA surveillance pathway                | 1.45E-05         | 91        | 732        | 10                 | GSPT2, CSTF2, UPF3B, PABPC1L2B, PPP2R3B, NXF3, PABPC5, NXT2, NXF2B, NXF5                                                                                                                                                                                                                                                |
| RNA transport                            | 4.08E-05         | 159       | 732        | 12                 | EIF2S3, UPF3B, PABPC1L2B, NXF3, FMR1, PABPC5, EIF1AX, NXT2, NXF2B, NXF5, GEMIN8, THOC2                                                                                                                                                                                                                                  |
| NF-kappa B signaling pathway             | 0.000999425      | 100       | 732        | 8                  | TAB3, CD40LG, BTK, IRAK1, EDA, EDA2R, IKBK, XIAP                                                                                                                                                                                                                                                                        |
| Cytokine-cytokine receptor interaction   | 0.006256074      | 292       | 732        | 12                 | BMP15, IL9R, CRLF2, IL2RG, IL13RA1, IL13RA2, CSF2RA, CXCR3, CD40LG, IL3RA, EDA, EDA2R                                                                                                                                                                                                                                   |

|                                         |                 |     |     |    |                                                                                                                        |
|-----------------------------------------|-----------------|-----|-----|----|------------------------------------------------------------------------------------------------------------------------|
| JAK-STAT signaling pathway              | 0.01580168<br>2 | 162 | 732 | 8  | IL9R, FHL1, CRLF2, IL2RG, IL13RA1, IL13RA2, CSF2RA, IL3RA                                                              |
| Influenza A                             | 0.01583581      | 167 | 732 | 8  | NXF3, TLR7, SLC25A5, NXT2, IKBKG, NXF2B, NXF5                                                                          |
| Primary immunodeficiency                | 0.01583581      | 37  | 732 | 4  | IL2RG, CD40LG, BTK, IKBKG                                                                                              |
| Herpes simplex virus 1 infection        | 0.01583581      | 487 | 732 | 15 | HCFC1, ZNF630, ZNF81, ZNF674, ZNF41, ZNF182, ZNF275, NXF3, ZNF157, IRAK1, IKBKG, NXF2B, NXF5, ZFP92, CFP               |
| Measles                                 | 0.01796710<br>6 | 138 | 732 | 7  | RAB9B, MSN, IL2RG, RAB9A, TLR7, IRAK1, IKBKG                                                                           |
| Salmonella infection                    | 0.04300724<br>9 | 214 | 732 | 8  | RAB9B, RAB9A, TAB3, IRAK1, IKBKG, FLNA, DYNLT3, PAK3                                                                   |
| Ubiquitin mediated proteolysis          | 0.01703084<br>5 | 135 | 732 | 7  | UBE2A, UBA1, CUL4B, HUWE1, KLHL13, MID1, XIAP                                                                          |
| Regulation of actin cytoskeleton        | 0.01703084<br>5 | 212 | 732 | 9  | DIAPH2, FGF16, MSN, ARHGEF6, FGD1, TMSB4X, LPAR4, PAK3, ARAF                                                           |
| MAPK signaling pathway                  | 0.03446666<br>4 | 295 | 732 | 10 | FGF16, CACNA1F, ELK1, IRAK1, IKBKG, FLNA, DUSP9, ARAF, RPS6KA6, RPS6KA3                                                |
| Necroptosis                             | 0.03599150<br>6 | 162 | 732 | 7  | SLC25A6, AIFM1, CYBB, H2AFB1, GLUD2, SLC25A5, XIAP                                                                     |
| Pathways in cancer                      | 0.04909849<br>3 | 529 | 732 | 14 | FGF16, PIM2, ELK1, AR, IL2RG, IL13RA1, CSF2RA, IL3RA, COL4A5, COL4A6, IKBKG, LPAR4, XIAP, ARAF                         |
| Neuroactive ligand-receptor interaction | 5.47E-05        | 338 | 732 | 17 | P2RY4, HTR2C, AVPR2, GLRA2, GABRE, AGTR2, BRS3, CYSLTR1, P2RY8, GPR50, GABRA3, LPAR4, GABRQ, APLN, GRIA3, P2RY10, GRPR |
| Ribosome biogenesis in eukaryotes       | 0.00119864<br>2 | 78  | 732 | 7  | GNL3L, NXF3, NXT2, NXF2B, NXF5, DKC1, UTP14A                                                                           |
| Calcium signaling pathway               | 0.01297104<br>4 | 192 | 732 | 9  | SLC25A6, PHKA1, CACNA1F, ATP2B3, HTR2C, PHKA2, SLC25A5, CYSLTR1, GRPR                                                  |
| Mineral absorption                      | 0.01379207<br>9 | 58  | 732 | 5  | ATP2B3, ATP1B4, HEPH, S100G, ATP7A                                                                                     |
| Nicotine addiction                      | 0.01703084<br>5 | 40  | 732 | 4  | GABRE, GABRA3, GABRQ, GRIA3                                                                                            |
| Retrograde endocannabinoid signaling    | 0.02557764<br>7 | 148 | 732 | 7  | NDUFB11, CACNA1F, GABRE, NDUFA1, GABRA3, GABRQ, GRIA3                                                                  |

|                          |                 |     |     |   |                                        |
|--------------------------|-----------------|-----|-----|---|----------------------------------------|
| Renin-angiotensin system | 0.02831690<br>4 | 23  | 732 | 3 | AGTR2, ATP6AP2, ACE2                   |
| GABAergic synapse        | 0.04275285<br>2 | 89  | 732 | 5 | CACNA1F, SLC38A5, GABRE, GABRA3, GABRQ |
| Y chromosome             |                 |     |     |   |                                        |
| M2 Macrophages           | 0.00040416      | 186 | 5   | 5 | USP9Y, RPS4Y1, EIF1AY, KDM5D, DX3Y     |

Foot note:

X chromosome genes correspond to the Figure 3 **Kyoto Encyclopedia of Genes and Genomes** (KEGG) pathways enrichment visualisation as determined by Over-representation analyses (ORA) using the R package gprofiler2 (v0.1.8)<sup>1</sup>. P-values were false discovery rate (FDR) adjusted. Significant gene sets were inferred, using a 0.05 significance level.

Y chromosome genes subjected to ORA identified custom selected immune pathways. ORA was applied using the R package gprofiler2 (v0.1.8). P-values were false discovery rate (FDR) adjusted. Significant gene sets were inferred, using a 0.05 significance level.

## Reference

- 1 Kolberg, L., Raudvere, U., Kuzmin, I., Vilo, J. & Peterson, H. gprofiler2 -- an R package for gene list functional enrichment analysis and namespace conversion toolset g:Profiler. *F1000Res* **9**, doi:10.12688/f1000research.24956.2 (2020).

Supplementary Table 2: **Among thirteen percent of non-reproductive cancers are associated with Infectious pathogens, the incidence in males is double that of females<sup>1</sup>.**

| Cancer burden from infections | Infectious pathogen                                                                      | Associated cancer risk                                          | References |
|-------------------------------|------------------------------------------------------------------------------------------|-----------------------------------------------------------------|------------|
| 90%                           | <i>Helicobacter Pylori</i>                                                               | Gastric cancer, non-Hodgkin lymphoma                            | 1          |
|                               | Hepatitis B virus (HBV)                                                                  | Hepatocellular carcinoma                                        | 1          |
|                               | Hepatitis C virus (HCV)                                                                  | Hepatocellular carcinoma, Non-Hodgkin lymphoma                  | 1          |
|                               | <b>Oncoviruses</b>                                                                       |                                                                 |            |
|                               | Epstein-Barr virus (EBV)                                                                 | Nasopharngeal carcinoma, Non-Hodgkin lymphoma, Burkitt lymphoma | 1,2        |
| <10%                          | Human herpes virus 8 (HHV-8; also known as Kaposi sarcoma-associated herpes virus; KSHV) | Kaposi sarcoma                                                  | 1,2        |
|                               | Human T cell leukemia/lymphoma virus type 1 (HTLV-1)                                     | Adult T cell Leukaemia/Lymphoma                                 | 1,2        |
|                               | Merkel cell Polyomavirus (MCP $\gamma$ V)                                                | Merkel cell carcinoma                                           | 1,2        |
|                               | Human immunodeficiency virus (HIV-1)                                                     | EBV-associated cancers<br>HHV-8 associated cancers              | 1,2        |

**Notes:**

- HTLV-1, EBV and MCP $\gamma$ V are regarded as a direct oncoviruses, as they encode either viral oncoproteins or active host oncoproteins; in contrast to indirect oncoviruses such as HCB and HCV that promote cancer for example by inducing chronic inflammation, or HIV-1 that imposes immune suppression<sup>2</sup>.
- High-risk Human Papilloma Virus (HPV), which accounts for 31.6% of all infection-associated cancers has been excluded from this analysis. HPV was omitted from this table as it contributes to very few non-reproductive cancers, but predominantly drives cancers of reproductive organs<sup>1</sup>.

**References**

- 1 de Martel, C., Georges, D., Bray, F., Ferlay, J. & Clifford, G. M. Global burden of cancer attributable to infections in 2018: a worldwide incidence analysis. *Lancet Glob Health* **8**, e180-e190, doi:10.1016/S2214-109X(19)30488-7 (2020).
- 2 Guven-Maiorov, E., Tsai, C. J. & Nussinov, R. Oncoviruses Can Drive Cancer by Rewiring Signaling Pathways Through Interface Mimicry. *Front Oncol* **9**, 1236, doi:10.3389/fonc.2019.01236 (2019).

Supplementary Table 3. **Male and Female Identity of Cell lines in the Broad Institute Cancer Cell Line Encyclopedia<sup>1</sup>**

Cell Lines from females and males

|               | pleura | liver | upper<br>aerodigestive<br>tract | kidney | cns | lung | oesophagus | large<br>intestine | haematopoietic<br>& lymph | stomach | ganglia | skin | pancreas | urinary<br>tract |
|---------------|--------|-------|---------------------------------|--------|-----|------|------------|--------------------|---------------------------|---------|---------|------|----------|------------------|
| Female        | 1      | 3     | 4                               | 3      | 11  | 49   | 6          | 18                 | 62                        | 11      | 5       | 20   | 14       | 11               |
| Male          | 9      | 22    | 28                              | 11     | 35  | 119  | 12         | 32                 | 107                       | 16      | 7       | 27   | 20       | 13               |
| Unknown       | 1      | 3     | 1                               | 22     | 23  | 19   | 9          | 12                 | 12                        | 11      | 5       | 15   | 12       | 4                |
| Ratio:<br>M/F | 9.0    | 7.3   | 7.0                             | 3.7    | 3.2 | 2.4  | 2.0        | 1.8                | 1.7                       | 1.5     | 1.4     | 1.4  | 1.4      | 1.2              |

Cell Lines with no females

|               | biliary<br>tract | salivary<br>gland | Small<br>intestine |
|---------------|------------------|-------------------|--------------------|
| Female        | 0                | 0                 | 0                  |
| Male          | 1                | 2                 | 0                  |
| Unknown       | 7                | 0                 | 1                  |
| Ratio:<br>M/F | -                | -                 | -                  |

Source: Broad Institute Cancer Cell Line Encyclopedia: <https://portals.broadinstitute.org/ccle/about#contact>

Reference

1. Ghandi, M. *et al.* Next-generation characterization of the Cancer Cell Line Encyclopedia. *Nature* **569**, 503-508, doi:10.1038/s41586-019-1186-3 (2019).
